# Supplementary material for: Micro/nano-structural evolution in spruce wood during soda pulping
Source: publisher site journal article supplement (doi:10.1515/hf-2020-0113), 2021-01-07
Supplement: Supplementary file 1 [file j_hf-2020-0113_suppl.docx]

**Supplementary material**

**Micro/nano-structural evolution in spruce wood during soda pulping**

Ahmed Wagih et al.

DOI 10.1515/hf-2020-0113

Supplementary Figure S1 shows a binarized image of the internal structure of the wood sample showing that most of the tracheids fit almost elliptical or elongated shape, which indicates that the used raw wood was “reaction wood”.

**Supplementary Figure S1:** Binarized image for the internal microstructure of spruce wood in transverse and tangential cross section.
